# Supplementary material for: FGF21 Mimics a Fasting-Induced Metabolic State and Increases Appetite in Zebrafish
Source: PubMed Central journal article supplement (PMC7181725; doi:10.1038/s41598-020-63726-w), 2020-04-24

# **FGF21 Mimics a Fasting-Induced Metabolic State and Increases Appetite in Zebrafish**

Ayelén Melisa Blanco<sup>1,2</sup>, Juan Ignacio Bertucci<sup>1,3</sup>, Suraj Unniappan<sup>1\*</sup>

<sup>1</sup> Laboratory of Integrative Neuroendocrinology, Department of Veterinary Biomedical Sciences, Western College of Veterinary Medicine, University of Saskatchewan, Saskatoon, Saskatchewan, Canada.

<sup>2</sup> Laboratorio de Fisiología Animal, Departamento de Biología Funcional e Ciencias da Saúde, Facultade de Biología and Centro de Investigación Mariña, Universidade de Vigo, Vigo, Pontevedra, Spain.

<sup>3</sup> Toxicology Centre, University of Saskatchewan, Saskatoon, Saskatchewan, Canada.

**Supplementary Figure 1.** Full-length images of immunoblots included in Figures 5f and i. Bands shown in Figures 5f and i are boxed. For each protein, two separate blots containing two samples per treatment were performed. Figure here shows one of those two blots. **(a)** GLUT2. **(b)** SGLT1. Molecular markers are included. See corresponding figure legend for details.

**a**

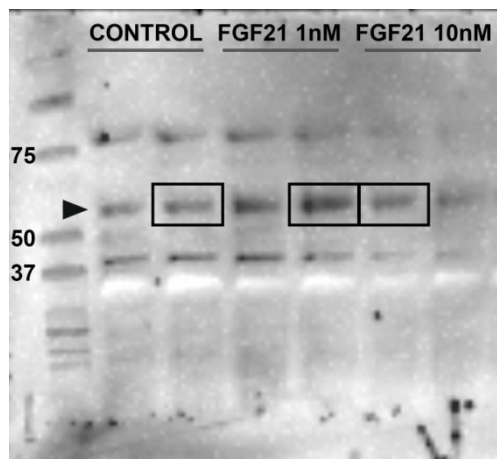

**b**

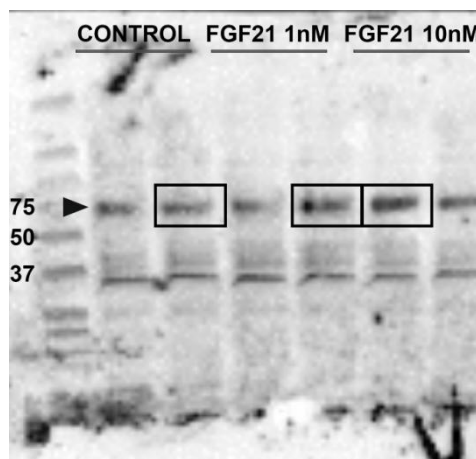

**Supplementary Figure 2.** Alignment between zebrafish (GenBank Accession number: NP\_001038789.1) and human (GenBank Accession number: AAQ89444.1) FGF21 proteins. Identical amino acids between the two sequences are color-shaded. The conserved cysteine residue is boxed.

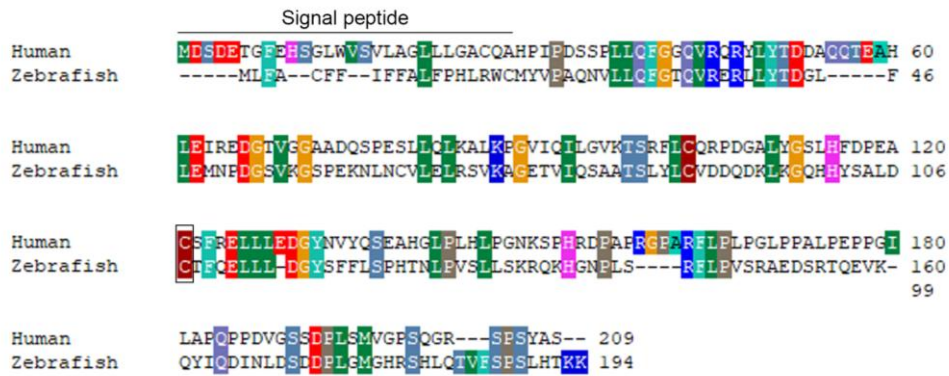

Supplement: 41598_2020_63726_MOESM1_ESM.pdf [file 41598_2020_63726_MOESM1_ESM.pdf]
